# Supplementary material for: Synthesis of N-doped hierarchical carbon spheres for CO2 capture and supercapacitors
Source: Royal Society of Chemistry journal article supplement (doi:10.1039/c5ra20484d), 2015-12-15
Supplement: c5ra20484d1.pdf [file c5ra20484d1.pdf]

## Supplementary Information

### Synthesis of N-doped hierarchical carbon spheres for CO<sub>2</sub> capture and supercapacitors

Ziqiang Wang,<sup>abc</sup> Lixian Sun,<sup>ab\*</sup> Fen Xu,<sup>b\*</sup> Xiaojun Peng,<sup>c</sup> Yongjin Zou,<sup>b</sup> Hailing Chu,<sup>b</sup> Liuzhang Ouyang,<sup>d</sup> Min Zhu<sup>d</sup>

<sup>a</sup> Dalian Institute of Chemical Physics, University of Chinese Academy of Sciences, 457 Zhongshan Road, Dalian 116023, P.R. China. E-mail: sunlx@guet.edu.cn, Tel: +86-773-2303763, Fax: +86-773-2290129

<sup>b</sup> Guangxi Key Laboratory of Information Materials, Guangxi Collaborative Innovation Center of Structure and Property for New Energy and Materials, School of Material Science and Engineering, Guilin University of Electronic Technology, Guilin, 541004, P. R. China.

<sup>c</sup> State Key Laboratory of Fine Chemicals, Dalian University of Technology, Dalian 116024, China

<sup>d</sup> School of materials science and engineering, South China University of technology, Guangzhou, China

### Isosteric heat of CO<sub>2</sub> adsorption for NC-2-600

Based on the previous literature<sup>1</sup>, the enthalpy of CO<sub>2</sub> adsorption for carbons was calculated from the Clausius-Clapeyron equation:

$$\ln\left(\frac{P_1}{P_2}\right) = \Delta H_{ads} \times \frac{T_2 - T_1}{R \times T_1 \times T_2} \quad (1)$$

( $T_i$  = temperature for isotherm  $i$ ;  $P_i$  = pressure for isotherm  $i$ ;  $R = 8.314 \text{ J K}^{-1} \text{ mol}^{-1}$ )

The pressure as a function of the amount of CO<sub>2</sub> adsorbed was determined using the Langmuir-Freundlich fit for the isotherms:

$$\frac{Q}{Q_m} = \frac{B \times P^{(1/t)}}{1 + B \times P^{(1/t)}} \quad (2)$$

( $Q$  = moles adsorbed;  $Q_m$  = moles adsorbed at saturation;  $P$  = pressure;  $B$  and  $t$  = constants)

Equation (2) can be rearranged to  $P = \left(\frac{Q}{B(Q_m - Q)}\right)^t$ . Heats of adsorption ( $Q_{st}$ ) can be obtained by adding the  $P$  into equation (1).

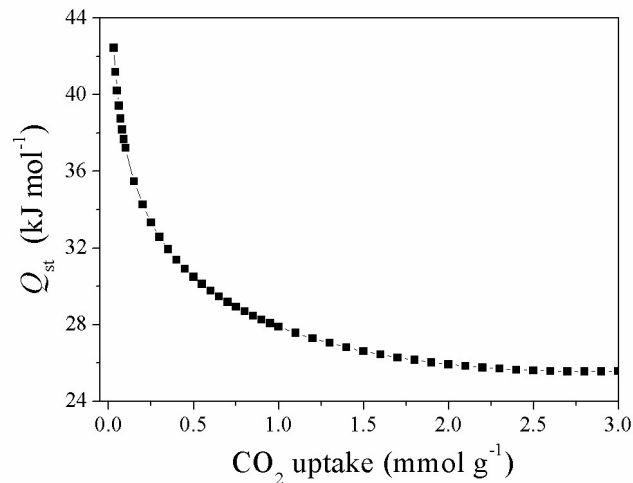

Fig. S1 The isosteric heat of adsorption for A-NHCS-2 at different CO<sub>2</sub> loadings.

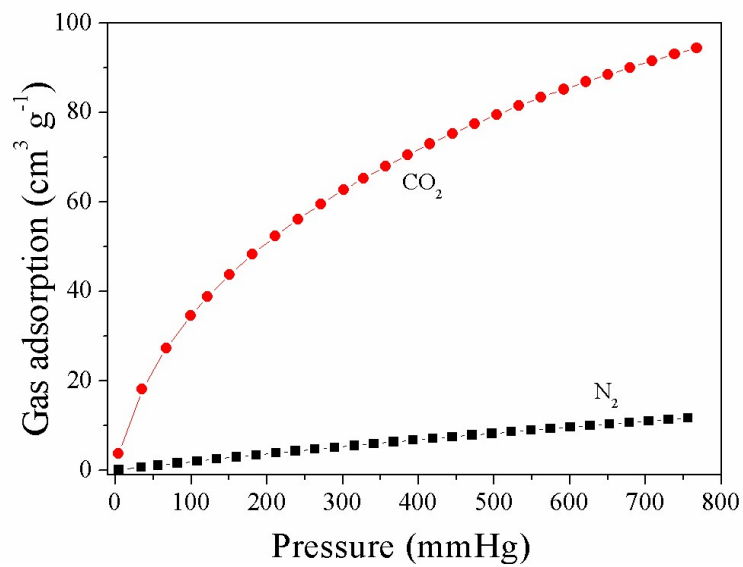

Fig. S2 Carbon dioxide and nitrogen adsorption isotherms of the A-NHCS-2 at 298 K.

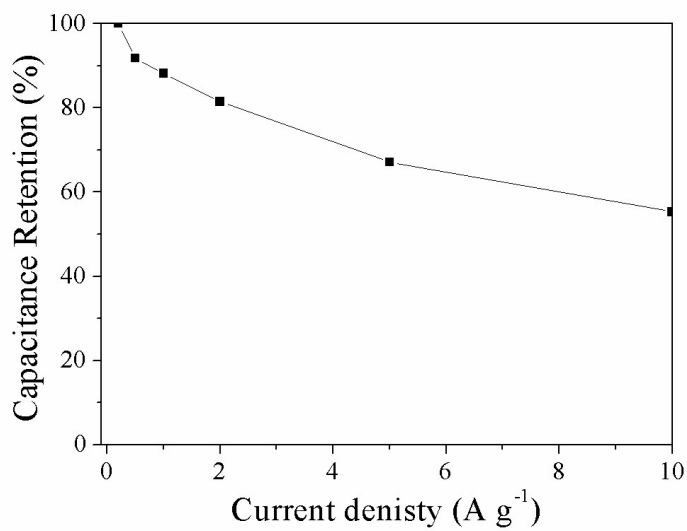

Fig. S3 Relationship between specific capacitance and the charge-discharge current densities of A-NHCS-2 in 6 M KOH.

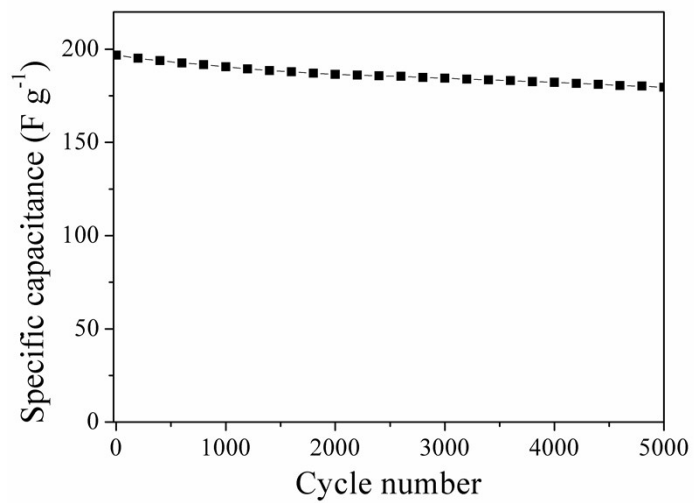

Fig. S4 Cycle life of A-NHCS-2 for 5000 cycles.

[1] Z. Wang, K. K. Tanabe and S. M. Cohen. *Chem. Eur. J.*, 2010; **16**: 212-217.
